# Supplementary material for: Insights into sex differences in perioperative outcomes of non-small cell lung cancer patients
Source: PubMed Central journal article supplement — Transl Lung Cancer Res. 2024 Oct 23;13(10):2549–60. doi: 10.21037/tlcr-24-336 (PMC11535826; doi:10.21037/tlcr-24-336), 2024-10-23
Supplement: tlcr-13-10-2549-supplementary.pdf [file tlcr-13-10-2549-supplementary.pdf]

Table S1 Stratified regression analysis of females and males on perioperative outcomes

| Variables                   | Female                     |           | Male                       |           |
|-----------------------------|----------------------------|-----------|----------------------------|-----------|
|                             | OR/beta 95% CI             | P value   | OR/beta 95% CI             | P value   |
| <b>Complications</b>        |                            |           |                            |           |
| Age                         | 1.0158 [1.0037, 1.0282]    | 0.011     | 1.0199 [1.0098, 1.0302]    | <0.001    |
| BMI                         | 0.9368 [0.8967, 0.9779]    | 0.003     | 0.9496 [0.9181, 0.9820]    | 0.003     |
| FEV1%                       | 1.0022 [0.9948, 1.0097]    | 0.558     | 0.9959 [0.9907, 1.0012]    | 0.128     |
| DLCO%                       | 0.9850 [0.9767, 0.9932]    | <0.001    | 0.9915 [0.9860, 0.9969]    | 0.002     |
| Neoadjuvant therapy         | 2.8036 [0.7957, 7.6518]    | 0.067     | 1.4611 [0.8162, 2.4901]    | 0.18      |
| <b>Resection extent</b>     |                            |           |                            |           |
| Lobectomy                   | Reference                  | Reference | Reference                  | Reference |
| Segmentectomy               | 0.6311 [0.4551, 0.8649]    | 0.005     | 0.5380 [0.3787, 0.7490]    | <0.001    |
| Wedge resection             | 0.5971 [0.2766, 1.1371]    | 0.148     | 0.4460 [0.2352, 0.7776]    | 0.008     |
| Pneumonectomy               | 0.0000 [NA, 5885542.7016]  | 0.971     | 0.4191 [0.1213, 1.1011]    | 0.113     |
| Tumor size                  | 1.0518 [0.9385, 1.1715]    | 0.372     | 1.0530 [0.9866, 1.1224]    | 0.117     |
| <b>Pleural adhesion</b>     |                            |           |                            |           |
| No                          |                            |           |                            |           |
| Moderate                    | 1.1493 [0.8848, 1.4983]    | 0.3       | 1.0912 [0.8800, 1.3548]    | 0.428     |
| Complete                    | 1.3144 [0.8440, 2.0034]    | 0.214     | 2.4168 [1.8238, 3.1963]    | <0.001    |
| Surgery duration            | 1.0104 [1.0079, 1.0129]    | <0.001    | 1.0055 [1.0038, 1.0071]    | <0.001    |
| Smoking history             | 0.9266 [0.3181, 2.1385]    | 0.873     | 1.0840 [0.8659, 1.3625]    | 0.485     |
| VATS versus open            | 0.5466 [0.2193, 1.1655]    | 0.151     | 0.5732 [0.3987, 0.8108]    | 0.002     |
| COPD (yes vs. no)           | 1.0405 [0.3007, 2.7169]    | 0.942     | 1.8095 [1.3086, 2.4799]    | <0.001    |
| <b>Postoperative LOS</b>    |                            |           |                            |           |
| Age                         | 0.0047 [0.0036, 0.0059]    | <0.001    | 0.0081 [0.0069, 0.0093]    | <0.001    |
| BMI                         | -0.0052 [-0.0093, -0.0011] | 0.013     | -0.0064 [-0.0105, -0.0023] | 0.002     |
| FEV1%                       | -0.0005 [-0.0012, 0.0003]  | 0.215     | -0.0010 [-0.0017, -0.0003] | 0.003     |
| DLCO%                       | -0.0015 [-0.0023, -0.0007] | <0.001    | -0.0024 [-0.0031, -0.0017] | <0.001    |
| Neoadjuvant therapy         | 0.1329 [-0.0198, 0.2783]   | 0.08      | 0.2072 [0.1367, 0.2763]    | <0.001    |
| <b>Resection extent</b>     |                            |           |                            |           |
| Lobectomy                   | Reference                  | Reference | Reference                  | Reference |
| Segmentectomy               | -0.1089 [-0.1382, -0.0796] | <0.001    | -0.1699 [-0.2070, -0.1330] | <0.001    |
| Wedge resection             | -0.0615 [-0.1166, -0.0071] | 0.028     | -0.1247 [-0.1842, -0.0661] | <0.001    |
| Pneumonectomy               | 0.2855 [0.1135, 0.4502]    | 0.001     | 0.2310 [0.1391, 0.3207]    | <0.001    |
| Tumor size                  | 0.0290 [0.0177, 0.0403]    | <0.001    | 0.0204 [0.0120, 0.0286]    | <0.001    |
| <b>Pleural adhesion</b>     |                            |           |                            |           |
| No                          |                            |           |                            |           |
| Moderate                    | 0.0256 [0.0007, 0.0505]    | 0.044     | 0.0609 [0.0350, 0.0869]    | <0.001    |
| Complete                    | 0.0527 [0.0060, 0.0990]    | 0.026     | 0.1946 [0.1558, 0.2333]    | <0.001    |
| Surgery duration            | 0.0033 [0.0030, 0.0036]    | <0.001    | 0.0022 [0.0020, 0.0024]    | <0.001    |
| Smoking history             | -0.1113 [-0.2077, -0.0179] | 0.021     | 0.0046 [-0.0228, 0.0320]   | 0.744     |
| VATS versus open            | 0.1729 [0.1048, 0.2400]    | <0.001    | 0.0515 [0.0103, 0.0925]    | 0.014     |
| COPD (yes vs. no)           | 0.1119 [0.0066, 0.2140]    | 0.034     | 0.1632 [0.1186, 0.2074]    | <0.001    |
| <b>Hospitalization cost</b> |                            |           |                            |           |
| Age                         | 0.0023 [0.0023, 0.0023]    | <0.001    | 0.0038 [0.0038, 0.0038]    | <0.001    |
| BMI                         | -0.0002 [-0.0002, -0.0001] | <0.001    | 0.0001 [0.0001, 0.0002]    | <0.001    |
| FEV1%                       | -0.0002 [-0.0002, -0.0002] | <0.001    | -0.0003 [-0.0003, -0.0003] | <0.001    |
| DLCO%                       | 0.0001 [0.0001, 0.0001]    | <0.001    | -0.0005 [-0.0005, -0.0005] | <0.001    |
| Neoadjuvant therapy         | 0.0189 [0.0172, 0.0205]    | <0.001    | 0.0419 [0.0410, 0.0427]    | <0.001    |
| <b>Resection extent</b>     |                            |           |                            |           |
| Lobectomy                   | Reference                  | Reference | Reference                  | Reference |
| Segmentectomy               | 0.0041 [0.0038, 0.0044]    | <0.001    | -0.0077 [-0.0081, -0.0073] | <0.001    |
| Wedge resection             | -0.1537 [-0.1543, -0.1531] | <0.001    | -0.1459 [-0.1465, -0.1452] | <0.001    |
| Pneumonectomy               | -0.0536 [-0.0560, -0.0513] | <0.001    | -0.0440 [-0.0453, -0.0427] | <0.001    |
| Tumor size                  | -0.0004 [-0.0006, -0.0003] | <0.001    | -0.0000 [-0.0001, 0.0001]  | 0.461     |
| <b>Pleural adhesion</b>     |                            |           |                            |           |
| No                          |                            |           |                            |           |
| Moderate                    | -0.0015 [-0.0018, -0.0013] | <0.001    | -0.0043 [-0.0046, -0.0041] | <0.001    |
| Complete                    | -0.0331 [-0.0336, -0.0326] | <0.001    | 0.0151 [0.0146, 0.0155]    | <0.001    |
| Surgery duration            | 0.0019 [0.0019, 0.0019]    | <0.001    | 0.0015 [0.0015, 0.0016]    | <0.001    |
| Smoking history             | -0.0095 [-0.0105, -0.0086] | <0.001    | 0.0024 [0.0021, 0.0027]    | <0.001    |
| VATS versus open            | -0.0376 [-0.0384, -0.0368] | <0.001    | -0.0326 [-0.0331, -0.0321] | <0.001    |
| COPD (yes vs. no)           | 0.0167 [0.0156, 0.0178]    | <0.001    | 0.0458 [0.0452, 0.0463]    | <0.001    |

OR, odds ratio; BMI, body mass index; FEV1%, predicted percentage of forced expiratory volume in 1 second; DLCO%, predicted percentage of diffusing capacity for carbon monoxide; VATS, video assisted thoracoscopic surgery; COPD, chronic obstructive pulmonary disease.

**Table S2** Mediation proportion (95% CI) of indirect effect on total effect of each individual mediator of outcomes

| Mediators        | Incidence of complications | Postoperative LOS    | Hospitalization cost |
|------------------|----------------------------|----------------------|----------------------|
| Age              | 0.033 (0.018, 0.096)       | 0.052 (0.018, 0.095) | 0.103 (0.043, 0.207) |
| BMI              | 0.077 (0.039, 0.162)       | 0.047 (0.085, 0.020) | -                    |
| FEV1%            | -                          | 0.064 (0.031, 0.114) | 0.057 (0.014, 0.336) |
| DLCO%            | 0.188 (0.115, 0.336)       | 0.220 (0.381, 0.135) | 0.108 (0.035, 0.255) |
| COPD             | 0.025 (0.008, 0.059)       | 0.673 (0.010, 1.996) | 0.015 (0.001, 0.05)  |
| Pleural adhesion | 0.021 (0.002, 0.079)       | 0.011 (0.000, 0.037) | 0.044 (0.001, 0.100) |
| Surgery duration | 0.082 (0.041, 0.178)       | 0.121 (0.052, 0.200) | 0.277 (0.144, 0.432) |

LOS, length of hospital stays; BMI, body mass index, FEV1%, predicted forced expiratory volume within 1 second, DLCO%, predicted diffused capacity for carbon monoxide; COPD, chronic obstructive pulmonary disease.
